# Supplementary material for: Photochemical assisted formation of silver nano dendrites and their application in amperometric sensing of nitrite
Source: Royal Society of Chemistry journal article supplement (doi:10.1039/c3ra45360j), 2013-11-22

**Supporting information:**

**Photochemical Assisted Formation of Silver Nano Dendrites and their  
Application in Amperometric Sensing of Nitrite**

**Sandeep Gupta, Rajiv Prakash\***

School of Materials Science and Technology,  
Indian Institute of Technology, Banaras Hindu University,  
Varanasi-221005, India

\*Corresponding Author , Fax: +91-542-2368707  
E-mail: rajivprakash12@yahoo.com

**SI-1:**

**UV-visible spectrum of Phenothiazine.**

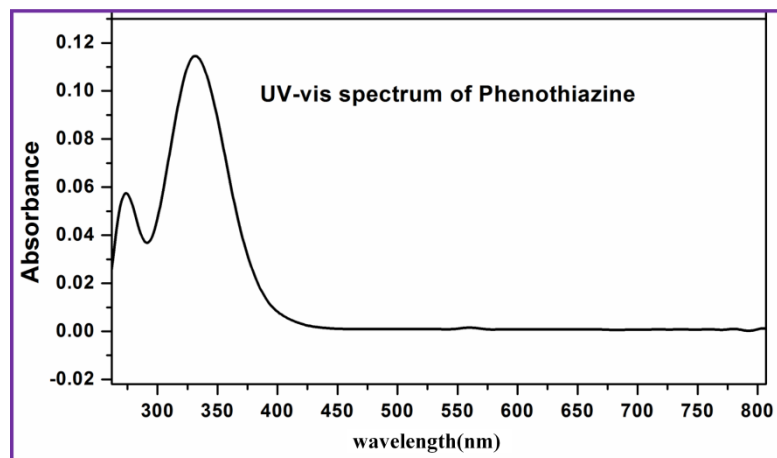

**SI-2:**

**Characteristic CV of Ag-PTZH in Tris HCl buffer and black run (gray colour) for bare electrode.**

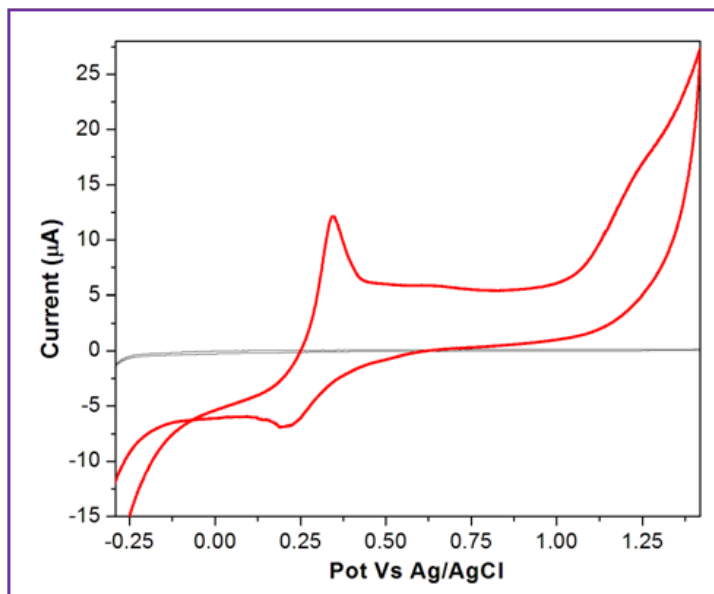

**SI-3:**

TEM images of Ag-PTZH when the reaction is carried out for longer time.

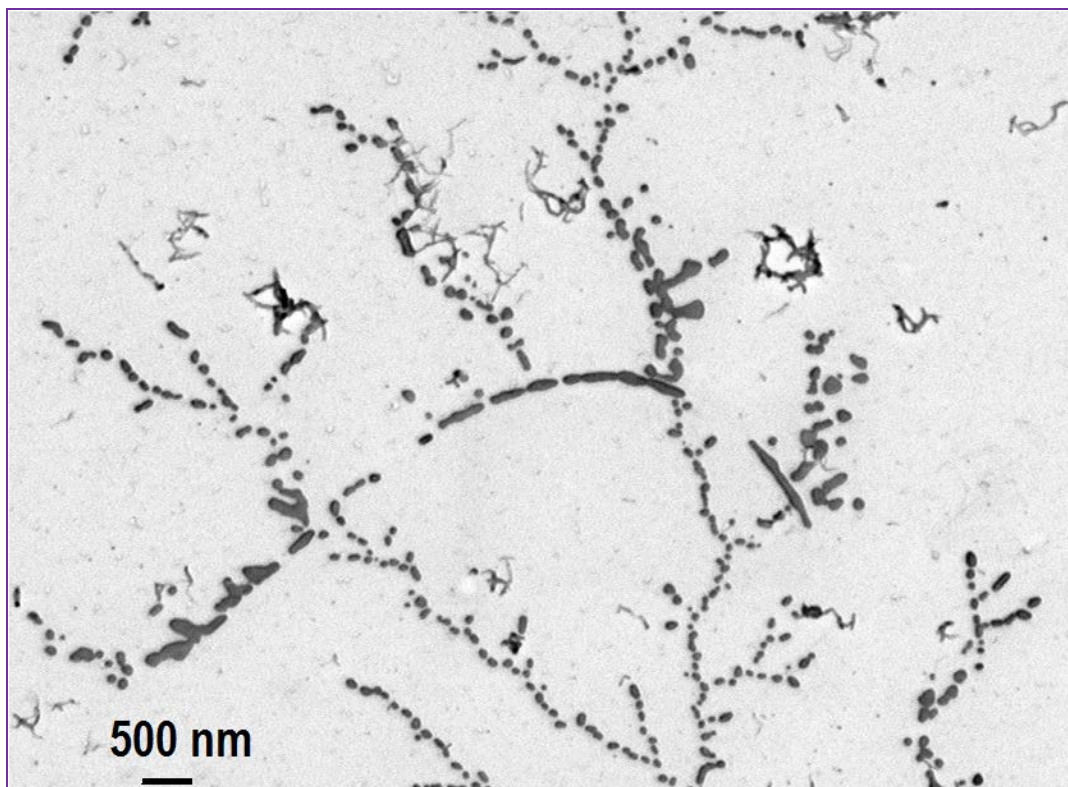

**SI-4:**

**FESEM image and EDAX of nanoassembled platform of Ag-PTZH on electrode surface:**

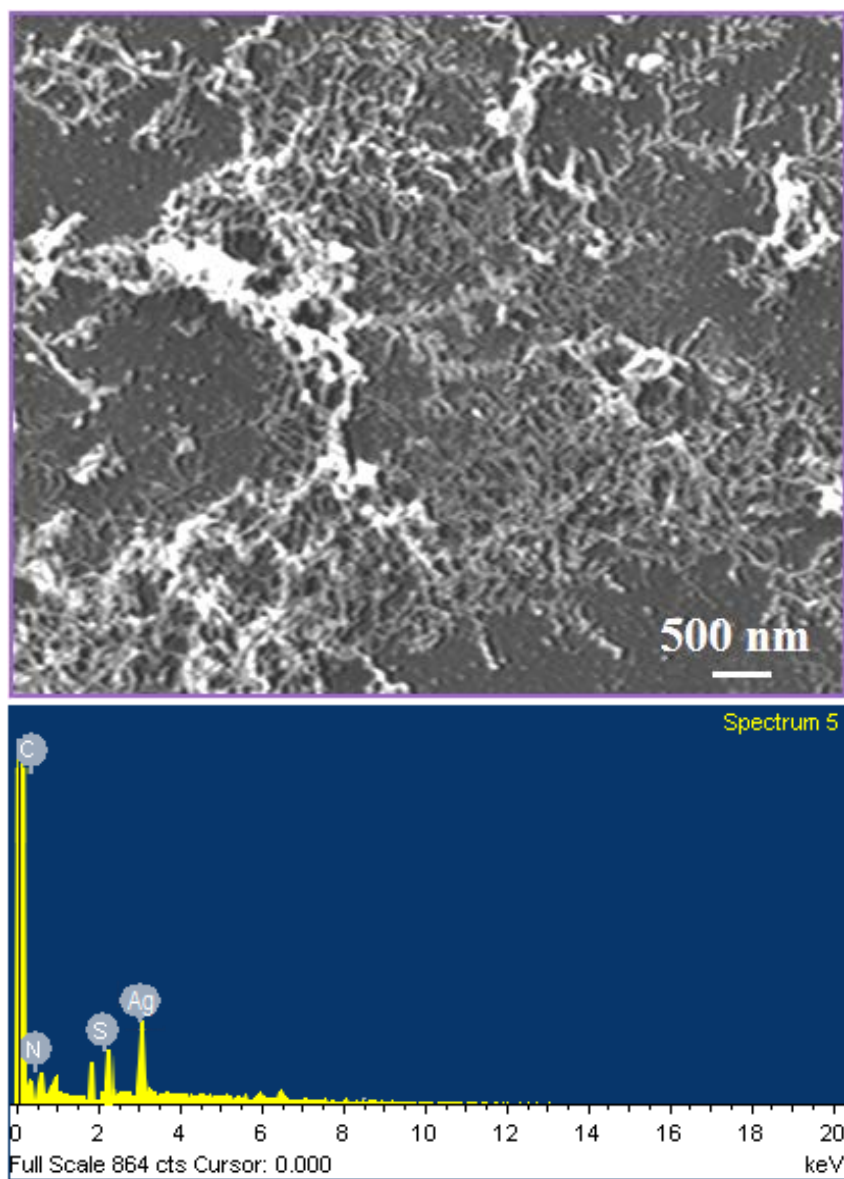

Supplement: c3ra45360j.pdf [file c3ra45360j.pdf]
